# Supplementary material for: Two-dimensional metal–organic frameworks as efficient electrocatalysts for bifunctional oxygen evolution/reduction reactions
Source: Royal Society of Chemistry journal article supplement (doi:10.1039/d2ta01319c), 2022-01-01
Supplement: d2ta01319c1.pdf [file d2ta01319c1.pdf]

## Supporting Information

### **Two-dimensional metal-organic frameworks as efficient bifunctional electrocatalysts for oxygen evolution/reduction reactions**

Anyang Wang,<sup>a</sup> Huan Niu,<sup>a</sup> Xiting Wang,<sup>a</sup> Xuhao Wan,<sup>a</sup> Liu Xie,<sup>b</sup> Zhaofu Zhang,<sup>c</sup>

Jun Wang,<sup>\*a</sup> and Yuzheng Guo<sup>\*a</sup>

a. School of Electrical Engineering and Automation, Wuhan University, Wuhan, Hubei 430072, China.

b. Yangtze Memory Technologies Co., Ltd., Wuhan, Hubei 430074, China.

c. Department of Engineering, Cambridge University, Cambridge, CB2 1PZ, United Kingdom.

\*Corresponding Author.

E-mail: junwangszu@163.com

E-mail: yguo@whu.edu.cn

**Table S1.** Formation energies ( $E_{\text{form}}$ ) of  $M_3(C_6S_6)_2$ , the number of transferred electrons ( $N_e$ ) during the process of dissolution, the standard dissolution potentials ( $U_{\text{diss-bulk}}$ ) of M bulk, and the calculated dissolution potentials ( $U_{\text{diss}}$ ) of M atoms on  $M_3(C_6S_6)_2$ .

| $M_3(C_6S_6)_2$ | $E_{\text{form}}$ | $N_e$ | $U_{\text{diss-bulk}}$ | $U_{\text{diss}}$ |
|-----------------|-------------------|-------|------------------------|-------------------|
| V               | -0.52             | 2     | -1.18                  | -0.92             |
| Cr              | -2.96             | 2     | -0.91                  | 0.57              |
| Mn              | -2.07             | 2     | -1.19                  | -0.15             |
| Fe              | -0.94             | 2     | -0.45                  | 0.02              |
| Co              | -1.08             | 2     | -0.28                  | 0.26              |
| Ni              | -1.86             | 2     | -0.26                  | 0.67              |
| Cu              | 0.86              | 2     | 0.34                   | -0.09             |
| Nb              | 1.96              | 3     | -1.1                   | -1.75             |
| Mo              | 1.94              | 3     | -0.2                   | -0.85             |
| Tc              | 3.68              | 2     | 0.400                  | -1.44             |
| Ru              | 1.97              | 2     | 0.46                   | -0.52             |
| Rh              | -1.89             | 2     | 0.6                    | 1.55              |
| Pd              | -1.39             | 2     | 0.95                   | 1.64              |
| Ir              | -0.34             | 3     | 1.16                   | 1.27              |
| Pt              | -3.00             | 2     | 1.18                   | 2.68              |

**Table S2.** The bond lengths between TM atoms and the neighboring S atoms ( $d_{\text{TM-S}}$ ) with a unit of Å and the charge transfer between TM atoms and the  $\text{C}_6\text{S}_6$  ( $Q_{\text{TM}}$ ) with a unit of  $e$ .

|                                       | $d_{\text{TM-S}}$ (Å) | $Q_{\text{TM}}$ ( $e$ ) |
|---------------------------------------|-----------------------|-------------------------|
| $\text{V}_3(\text{C}_6\text{S}_6)_2$  | 2.28                  | -1.47                   |
| $\text{Cr}_3(\text{C}_6\text{S}_6)_2$ | 2.27                  | -1.20                   |
| $\text{Mn}_3(\text{C}_6\text{S}_6)_2$ | 2.25                  | -1.13                   |
| $\text{Fe}_3(\text{C}_6\text{S}_6)_2$ | 2.17                  | -0.82                   |
| $\text{Co}_3(\text{C}_6\text{S}_6)_2$ | 2.14                  | -0.61                   |
| $\text{Ni}_3(\text{C}_6\text{S}_6)_2$ | 2.14                  | -0.51                   |
| $\text{Nb}_3(\text{C}_6\text{S}_6)_2$ | 2.36                  | -1.53                   |
| $\text{Mo}_3(\text{C}_6\text{S}_6)_2$ | 2.36                  | -1.29                   |
| $\text{Tc}_3(\text{C}_6\text{S}_6)_2$ | 2.27                  | -0.86                   |
| $\text{Ru}_3(\text{C}_6\text{S}_6)_2$ | 2.17                  | -0.71                   |
| $\text{Rh}_3(\text{C}_6\text{S}_6)_2$ | 2.25                  | -0.40                   |
| $\text{Pd}_3(\text{C}_6\text{S}_6)_2$ | 2.28                  | -0.31                   |
| $\text{Ir}_3(\text{C}_6\text{S}_6)_2$ | 2.25                  | -0.39                   |
| $\text{Pt}_3(\text{C}_6\text{S}_6)_2$ | 2.27                  | -0.23                   |

**Table S3.** Calculated zero-point energies and Gibbs free energies of \*OH on  $M_3(C_6S_6)_2$ .

|                  | $E_{ZPE}$ (eV) | G (eV)  |
|------------------|----------------|---------|
| $V_3(C_6S_6)_2$  | 0.27           | -197.00 |
| $Cr_3(C_6S_6)_2$ | 0.30           | -197.40 |
| $Mn_3(C_6S_6)_2$ | 0.30           | -196.36 |
| $Fe_3(C_6S_6)_2$ | 0.29           | -193.03 |
| $Co_3(C_6S_6)_2$ | 0.31           | -188.92 |
| $Ni_3(C_6S_6)_2$ | 0.25           | -184.38 |
| $Nb_3(C_6S_6)_2$ | 0.28           | -200.37 |
| $Mo_3(C_6S_6)_2$ | 0.31           | -199.59 |
| $Tc_3(C_6S_6)_2$ | 0.31           | -198.18 |
| $Ru_3(C_6S_6)_2$ | 0.33           | -193.81 |
| $Rh_3(C_6S_6)_2$ | 0.30           | -189.12 |
| $Pd_3(C_6S_6)_2$ | 0.24           | -182.87 |
| $Ir_3(C_6S_6)_2$ | 0.31           | -193.84 |
| $Pt_3(C_6S_6)_2$ | 0.26           | -187.09 |

\* Only the adsorbed species are considered during the process of ZPE calculations, and  $T\Delta S$  is specified as zero.

**Table S4.** Calculated zero-point energies and Gibbs free energies of \*O on  $M_3(C_6S_6)_2$ .

|                  | $E_{ZPE}$ (eV) | G (eV)  |
|------------------|----------------|---------|
| $V_3(C_6S_6)_2$  | 0.05           | -193.11 |
| $Cr_3(C_6S_6)_2$ | 0.05           | -194.02 |
| $Mn_3(C_6S_6)_2$ | 0.06           | -192.80 |
| $Fe_3(C_6S_6)_2$ | 0.05           | -188.60 |
| $Co_3(C_6S_6)_2$ | 0.03           | -184.31 |
| $Ni_3(C_6S_6)_2$ | 0.01           | -178.90 |
| $Nb_3(C_6S_6)_2$ | 0.05           | -196.43 |
| $Mo_3(C_6S_6)_2$ | 0.06           | -196.12 |
| $Tc_3(C_6S_6)_2$ | 0.06           | -194.86 |
| $Ru_3(C_6S_6)_2$ | 0.06           | -190.18 |
| $Rh_3(C_6S_6)_2$ | 0.03           | -184.43 |
| $Pd_3(C_6S_6)_2$ | 0.01           | -177.05 |
| $Ir_3(C_6S_6)_2$ | 0.04           | -189.49 |
| $Pt_3(C_6S_6)_2$ | 0.01           | -181.75 |

**Table S5.** Calculated zero-point energies and Gibbs free energies of \*OOH on  $M_3(C_6S_6)_2$ .

|                  | EZPE (eV) | G (eV)  |
|------------------|-----------|---------|
| $V_3(C_6S_6)_2$  | 0.37      | -201.07 |
| $Cr_3(C_6S_6)_2$ | 0.34      | -201.61 |
| $Mn_3(C_6S_6)_2$ | 0.35      | -200.74 |
| $Fe_3(C_6S_6)_2$ | 0.32      | -197.40 |
| $Co_3(C_6S_6)_2$ | 0.34      | -193.33 |
| $Ni_3(C_6S_6)_2$ | 0.33      | -188.88 |
| $Nb_3(C_6S_6)_2$ | 0.37      | -204.35 |
| $Mo_3(C_6S_6)_2$ | 0.33      | -203.46 |
| $Tc_3(C_6S_6)_2$ | 0.34      | -202.32 |
| $Ru_3(C_6S_6)_2$ | 0.34      | -198.18 |
| $Rh_3(C_6S_6)_2$ | 0.34      | -193.59 |
| $Pd_3(C_6S_6)_2$ | 0.27      | -187.51 |
| $Ir_3(C_6S_6)_2$ | 0.35      | -198.32 |
| $Pt_3(C_6S_6)_2$ | 0.29      | -191.56 |

**Table S6.** The adsorption energies of \*OH, \*O and \*OOH ( $\Delta G_{*OH}$ ,  $\Delta G_{*O}$  and  $\Delta G_{*OOH}$ ).

|                  | $\Delta G_{*OH}$ (eV) | $\Delta G_{*O}$ (eV) | $\Delta G_{*OOH}$ (eV) |
|------------------|-----------------------|----------------------|------------------------|
| $V_3(C_6S_6)_2$  | -1.35                 | -0.86                | 2.00                   |
| $Cr_3(C_6S_6)_2$ | -0.37                 | -0.39                | 2.85                   |
| $Mn_3(C_6S_6)_2$ | 0.69                  | 0.85                 | 3.73                   |
| $Fe_3(C_6S_6)_2$ | 0.79                  | 1.82                 | 3.84                   |
| $Co_3(C_6S_6)_2$ | 1.26                  | 2.47                 | 4.27                   |
| $Ni_3(C_6S_6)_2$ | 2.05                  | 4.13                 | 4.97                   |
| $Nb_3(C_6S_6)_2$ | -1.86                 | -1.33                | 1.58                   |
| $Mo_3(C_6S_6)_2$ | -0.58                 | -0.51                | 2.98                   |
| $Tc_3(C_6S_6)_2$ | -1.00                 | -1.08                | 2.28                   |
| $Ru_3(C_6S_6)_2$ | 0.07                  | 0.30                 | 3.12                   |
| $Rh_3(C_6S_6)_2$ | 1.15                  | 2.45                 | 4.11                   |
| $Pd_3(C_6S_6)_2$ | 2.28                  | 4.70                 | 5.06                   |
| $Ir_3(C_6S_6)_2$ | 1.15                  | 2.09                 | 4.09                   |
| $Pt_3(C_6S_6)_2$ | 2.30                  | 4.25                 | 5.26                   |

**Table S7.** The free energy changes of each elementary step ( $\Delta G_1$ ,  $\Delta G_2$ ,  $\Delta G_3$  and  $\Delta G_4$ ) and the overpotential of OER and ORR ( $\eta_{\text{OER}}$  and  $\eta_{\text{ORR}}$ ).

|                                       | $\Delta G_1$ (eV) | $\Delta G_2$ (eV) | $\Delta G_3$ (eV) | $\Delta G_4$ (eV) | $\eta_{\text{OER}}$ (V) | $\eta_{\text{ORR}}$ (V) |
|---------------------------------------|-------------------|-------------------|-------------------|-------------------|-------------------------|-------------------------|
| $\text{V}_3(\text{C}_6\text{S}_6)_2$  | -1.35             | 0.49              | 2.86              | 2.92              | 1.69                    | 2.58                    |
| $\text{Cr}_3(\text{C}_6\text{S}_6)_2$ | -0.37             | -0.02             | 3.24              | 2.07              | 2.01                    | 1.60                    |
| $\text{Mn}_3(\text{C}_6\text{S}_6)_2$ | 0.69              | 0.16              | 2.88              | 1.19              | 1.65                    | 1.07                    |
| $\text{Fe}_3(\text{C}_6\text{S}_6)_2$ | 0.79              | 1.03              | 2.02              | 1.08              | 0.79                    | 0.44                    |
| $\text{Co}_3(\text{C}_6\text{S}_6)_2$ | 1.26              | 1.21              | 1.80              | 0.65              | 0.57                    | 0.58                    |
| $\text{Ni}_3(\text{C}_6\text{S}_6)_2$ | 2.05              | 2.08              | 0.83              | -0.05             | 0.85                    | 1.28                    |
| $\text{Nb}_3(\text{C}_6\text{S}_6)_2$ | -1.86             | 0.53              | 2.90              | 3.34              | 2.11                    | 3.09                    |
| $\text{Mo}_3(\text{C}_6\text{S}_6)_2$ | -0.58             | 0.07              | 3.48              | 1.94              | 2.25                    | 1.81                    |
| $\text{Tc}_3(\text{C}_6\text{S}_6)_2$ | -1.00             | -0.08             | 3.36              | 2.64              | 2.13                    | 2.23                    |
| $\text{Ru}_3(\text{C}_6\text{S}_6)_2$ | 0.07              | 0.23              | 2.82              | 1.80              | 1.59                    | 1.16                    |
| $\text{Rh}_3(\text{C}_6\text{S}_6)_2$ | 1.15              | 1.30              | 1.66              | 0.81              | 0.43                    | 0.42                    |
| $\text{Pd}_3(\text{C}_6\text{S}_6)_2$ | 2.28              | 2.42              | 0.36              | -0.14             | 1.19                    | 1.37                    |
| $\text{Ir}_3(\text{C}_6\text{S}_6)_2$ | 1.15              | 0.95              | 2.00              | 0.83              | 0.77                    | 0.40                    |
| $\text{Pt}_3(\text{C}_6\text{S}_6)_2$ | 2.30              | 1.95              | 1.01              | -0.34             | 1.07                    | 1.57                    |



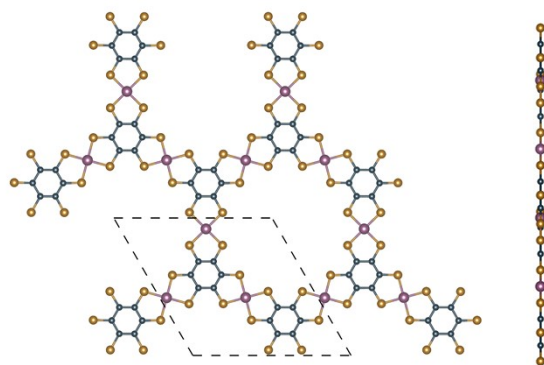

**Fig. S1.** Top and side views of  $M_3(C_6S_6)_2$ .

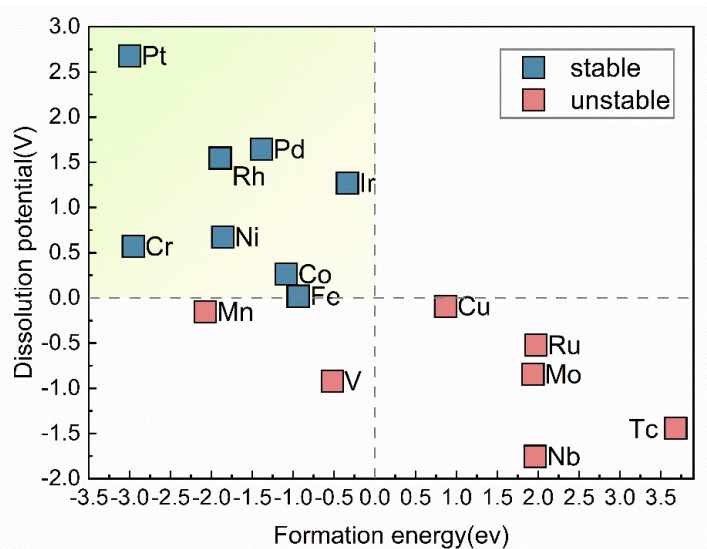

**Fig. S2.** The formation energy ( $E_{\text{form}}$ ) and the dissolution potential ( $U_{\text{diss}}$ ) of TM atoms. For a stable  $M_3(C_6S_6)_2$  system,  $E_{\text{form}} < 0$  eV and  $U_{\text{diss}} > 0$  V should be satisfied.

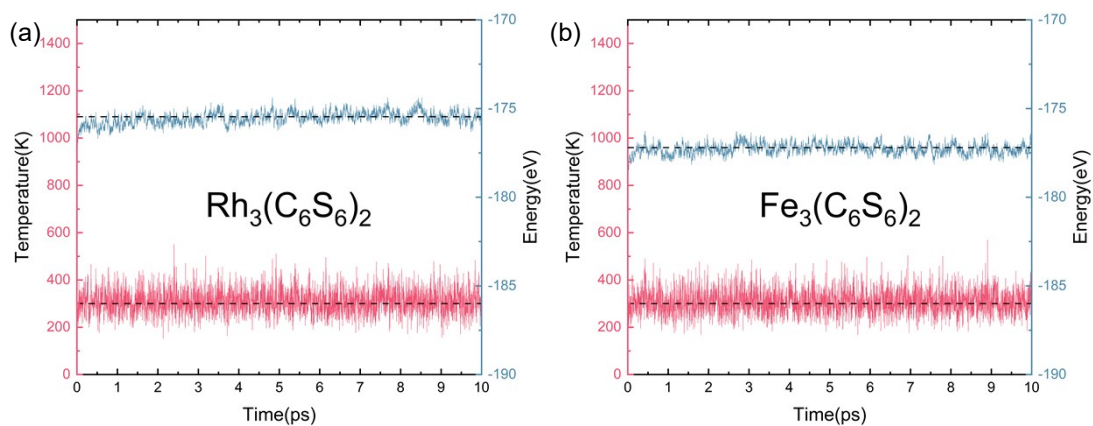

**Fig. S3.** Variations of energy and temperature versus the AIMD simulation time for (a)  $Rh_3(C_6S_6)_2$  and (b)  $Fe_3(C_6S_6)_2$ , the simulation lasts for 10 ps at 300 K.

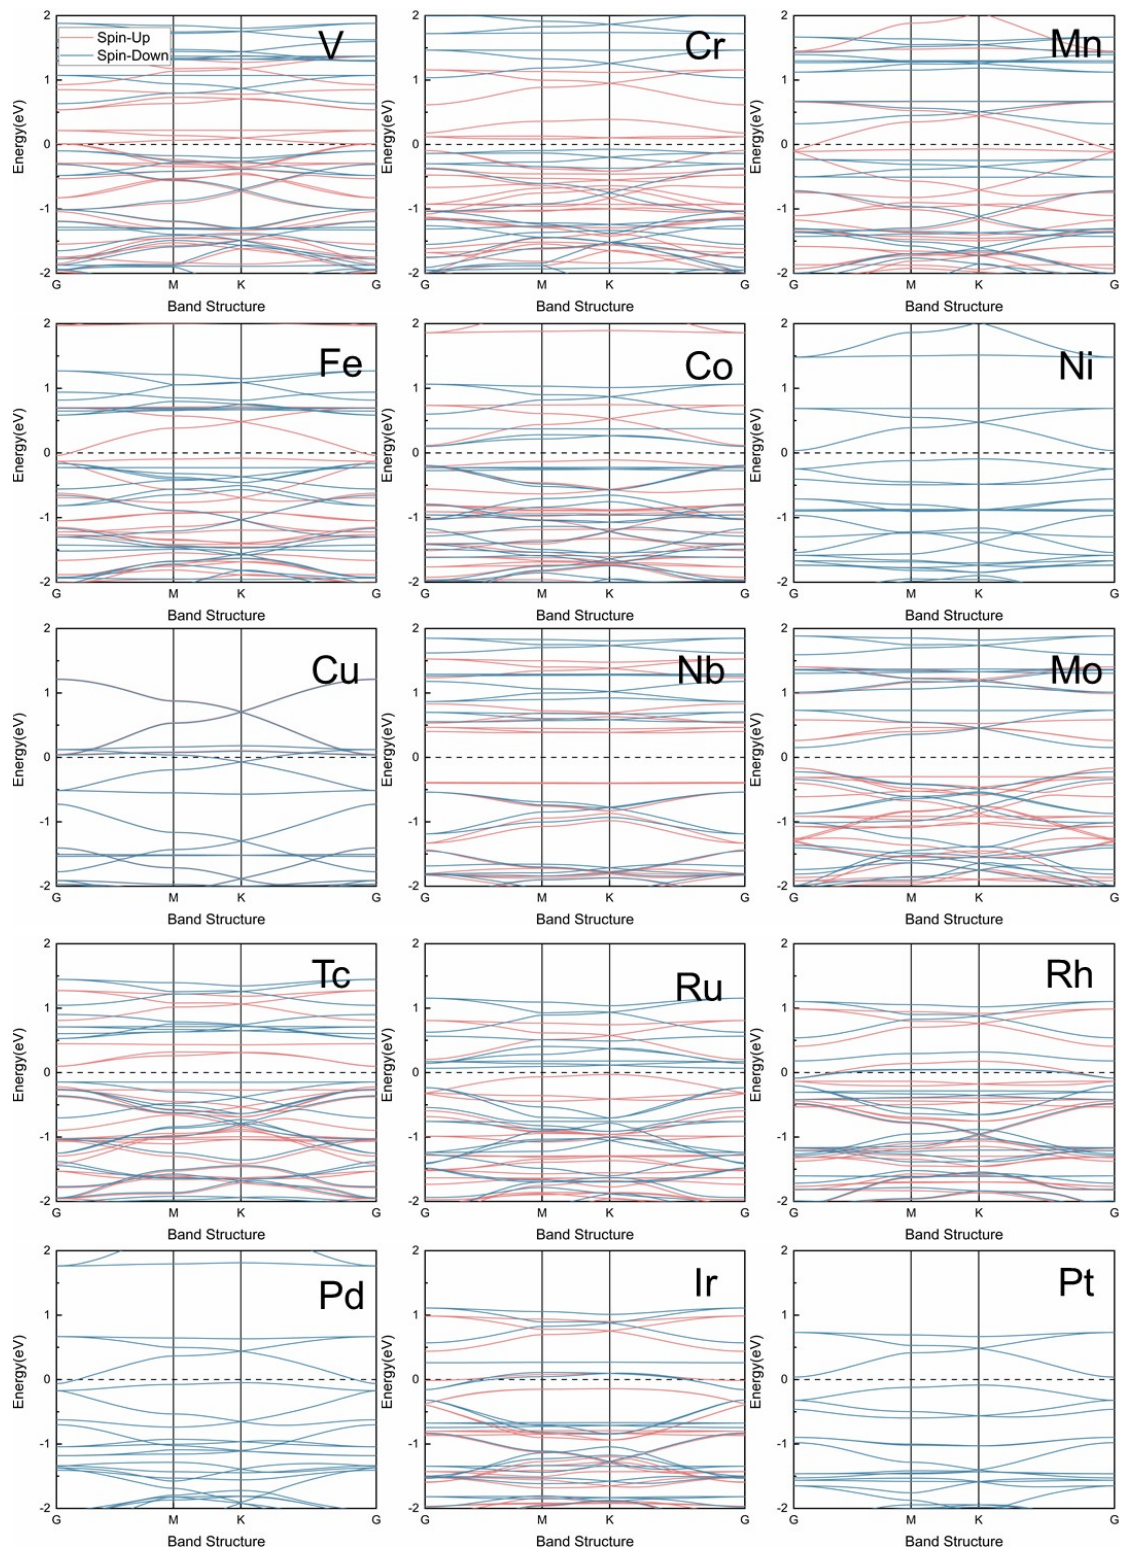

**Fig. S4.** Band structure of  $M_3(C_6S_6)_2$ .

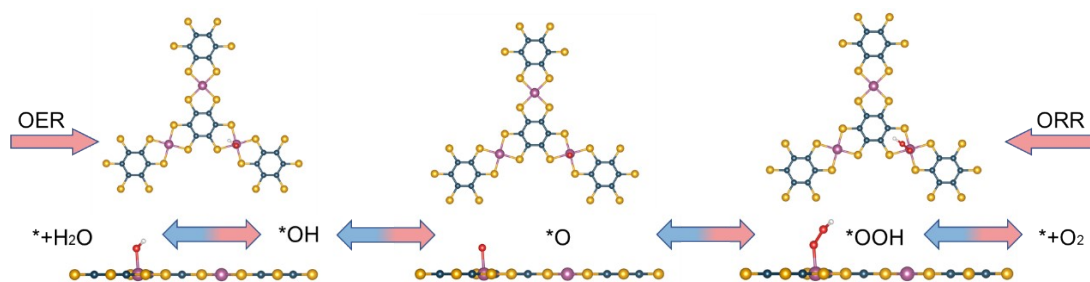

**Fig. S5.** The structures of intermediates (\*OH, \*O, and \*OOH) of OER and ORR adsorbed on  $M_3(C_6S_6)_2$ .

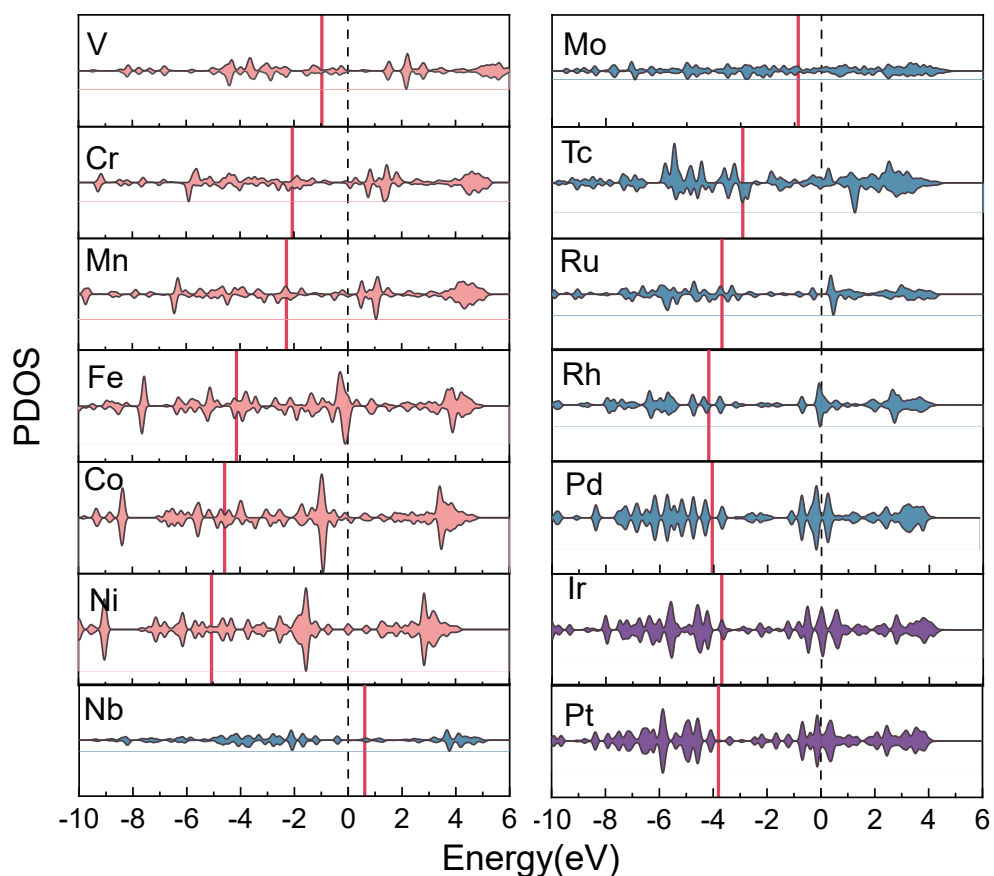

**Fig. S6.** The partial density of states (PDOS) of d orbitals for  $M_3(C_6S_6)_2$ . The  $d$ -band centers ( $\varepsilon_d$ ) are also labeled for 3d TM, from V to Ni; 4d TM, from Nb to Pd; and 5d TM, from Ir to Pt. The Fermi level ( $E_F$ ) is set to 0 eV. Different fill colors (red, blue, and purple) represent different periods (fourth, fifth and sixth periods).

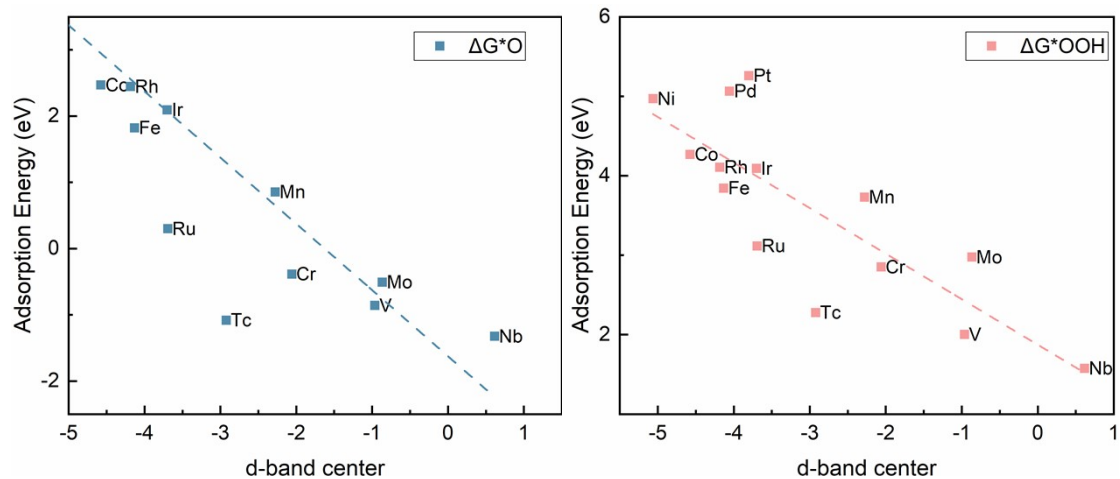

**Fig. S7.** The relationship between the d-band center and the adsorption energy of \*O and \*OOH.

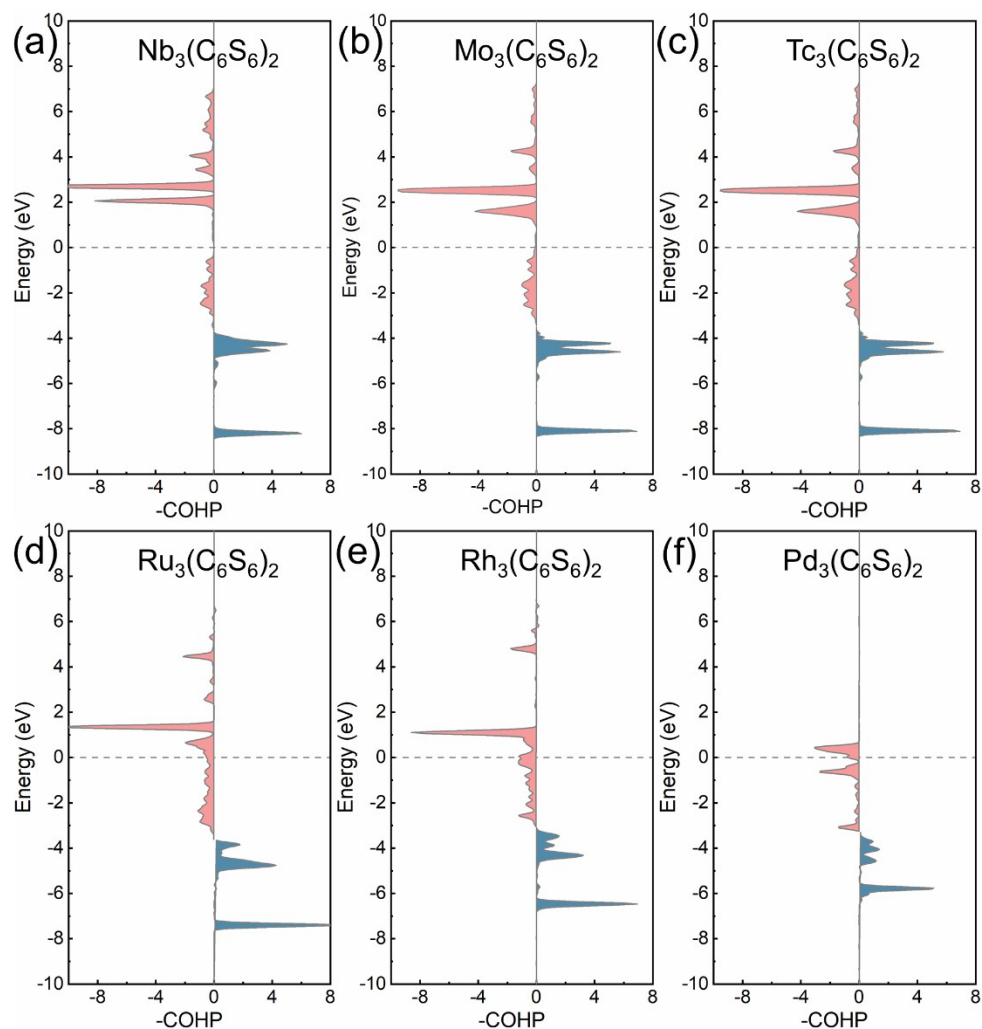

**Fig. S8.** (a)-(f) pCOHP between 4d TM centers (from Nb to Pd) and OH intermediate. The right and left sides represent the bonding and antibonding contributions, respectively.
